# Supplementary material for: Application of chemical vapor generation systems to deliver constant gas concentrations for in vitro exposure to volatile organic compounds
Source: Royal Society of Chemistry journal article supplement (doi:10.1039/c4em00465e), 2014-01-01
Supplement: c4em00465e1.pdf [file c4em00465e1.pdf]

**Electronic Supplemental Information**

**Application of chemical vapor generation systems to deliver constant gas concentrations  
for *in vitro* exposure to volatile organic compounds**

Ying-Hsuan Lin<sup>1</sup>, Ken Sexton<sup>1</sup>, Ilona Jaspers<sup>2,3,4,5</sup>, Ya-Ru Li<sup>1</sup>, Jason D. Surratt<sup>1</sup>, William  
Vizuete<sup>1\*</sup>

<sup>1</sup> Department of Environmental Sciences and Engineering, Gillings School of Global Public Health, The University of North Carolina at Chapel Hill, Chapel Hill, NC 27599, USA

<sup>2</sup> Center for Environmental Medicine, Asthma, and Lung Biology, School of Medicine, University of North Carolina at Chapel Hill, , Chapel Hill, NC 27599, USA

<sup>3</sup> Curriculum in Toxicology, University of North Carolina at Chapel Hill, Chapel Hill, NC 27599, USA

<sup>4</sup> Department of Pediatrics, School of Medicine, University of North Carolina at Chapel Hill, Chapel Hill, NC 27599, USA

<sup>5</sup> Department of Microbiology and Immunology, School of Medicine, University of North Carolina at Chapel Hill, Chapel Hill, NC 27599, USA

\*Corresponding author

For Submission to: Environmental Science: Processes & Impacts

This supporting information contains 4 tables

**Table S1. Statistical results for effects of acrolein concentrations on LDH release of A549 human alveolar epithelial lung cells**

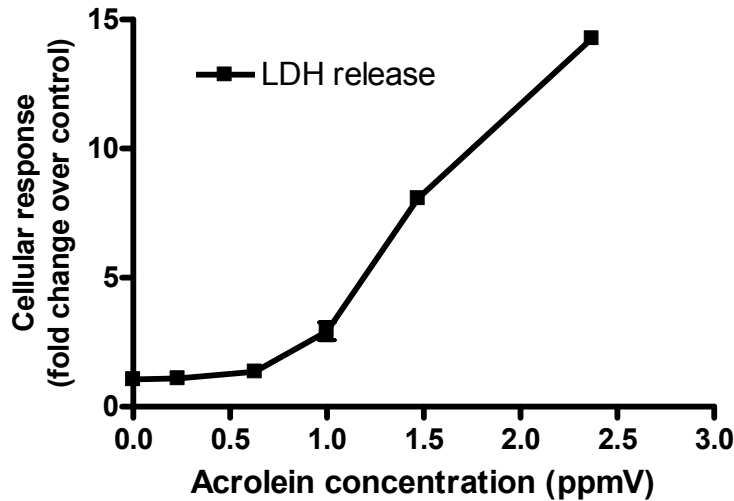

| Parameter                        | Value      | Data Set-B | Data Set-C | Data Set-D        |
|----------------------------------|------------|------------|------------|-------------------|
| Tukey's Multiple Comparison Test | Mean Diff. | q          | P value    | 95% CI of diff    |
| 0 vs 0.23                        | -0.04540   | 0.1879     | P > 0.05   | -1.102 to 1.011   |
| 0 vs 0.63                        | -0.3314    | 1.372      | P > 0.05   | -1.388 to 0.7251  |
| 0 vs 1                           | -2.038     | 8.436      | P < 0.001  | -3.095 to -0.9816 |
| 0 vs 1.47                        | -7.015     | 29.04      | P < 0.001  | -8.072 to -5.959  |
| 0 vs 2.37                        | -13.07     | 54.08      | P < 0.001  | -14.12 to -12.01  |
| 0.23 vs 0.63                     | -0.2860    | 1.184      | P > 0.05   | -1.343 to 0.7705  |
| 0.23 vs 1                        | -1.993     | 8.248      | P < 0.001  | -3.049 to -0.9362 |
| 0.23 vs 1.47                     | -6.970     | 28.85      | P < 0.001  | -8.027 to -5.913  |
| 0.23 vs 2.37                     | -13.02     | 53.89      | P < 0.001  | -14.08 to -11.96  |
| 0.63 vs 1                        | -1.707     | 7.064      | P < 0.001  | -2.763 to -0.6502 |
| 0.63 vs 1.47                     | -6.684     | 27.67      | P < 0.001  | -7.741 to -5.627  |
| 0.63 vs 2.37                     | -12.73     | 52.71      | P < 0.001  | -13.79 to -11.68  |
| 1 vs 1.47                        | -4.977     | 20.60      | P < 0.001  | -6.034 to -3.921  |
| 1 vs 2.37                        | -11.03     | 45.64      | P < 0.001  | -12.08 to -9.971  |
| 1.47 vs 2.37                     | -6.050     | 25.04      | P < 0.001  | -7.107 to -4.994  |

**Table S2. Statistical results for effects of methacrolein concentrations on LDH release of A549 human alveolar epithelial lung cells**

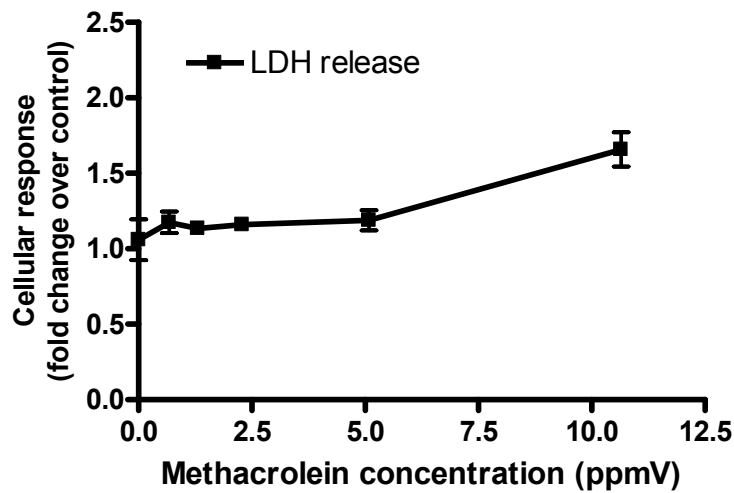

| Parameter                        | Value      | Data Set-B | Data Set-C | Data Set-D          |
|----------------------------------|------------|------------|------------|---------------------|
| Tukey's Multiple Comparison Test | Mean Diff. | q          | P value    | 95% CI of diff      |
| 0 vs 0.68                        | -0.1321    | 1.463      | P > 0.05   | -0.5215 to 0.2574   |
| 0 vs 1.31                        | -0.09259   | 1.026      | P > 0.05   | -0.4820 to 0.2969   |
| 0 vs 2.29                        | -0.1164    | 1.290      | P > 0.05   | -0.5059 to 0.2730   |
| 0 vs 5.09                        | -0.1462    | 1.619      | P > 0.05   | -0.5356 to 0.2433   |
| 0 vs 10.7                        | -0.6154    | 6.816      | P < 0.001  | -1.005 to -0.2259   |
| 0.68 vs 1.31                     | 0.03947    | 0.4585     | P > 0.05   | -0.3319 to 0.4108   |
| 0.68 vs 2.29                     | 0.01563    | 0.1816     | P > 0.05   | -0.3557 to 0.3870   |
| 0.68 vs 5.09                     | -0.01409   | 0.1637     | P > 0.05   | -0.3854 to 0.3572   |
| 0.68 vs 10.7                     | -0.4833    | 5.615      | P < 0.01   | -0.8546 to -0.1120  |
| 1.31 vs 2.29                     | -0.02383   | 0.2769     | P > 0.05   | -0.3952 to 0.3475   |
| 1.31 vs 5.09                     | -0.05356   | 0.6222     | P > 0.05   | -0.4249 to 0.3178   |
| 1.31 vs 10.7                     | -0.5228    | 6.073      | P < 0.01   | -0.8941 to -0.1514  |
| 2.29 vs 5.09                     | -0.02973   | 0.3453     | P > 0.05   | -0.4010 to 0.3416   |
| 2.29 vs 10.7                     | -0.4989    | 5.796      | P < 0.01   | -0.8703 to -0.1276  |
| 5.09 vs 10.7                     | -0.4692    | 5.451      | P < 0.01   | -0.8405 to -0.09789 |

**Table S3. Statistical results for effects of acrolein concentrations on IL-8 gene expression of A549 human alveolar epithelial lung cells**

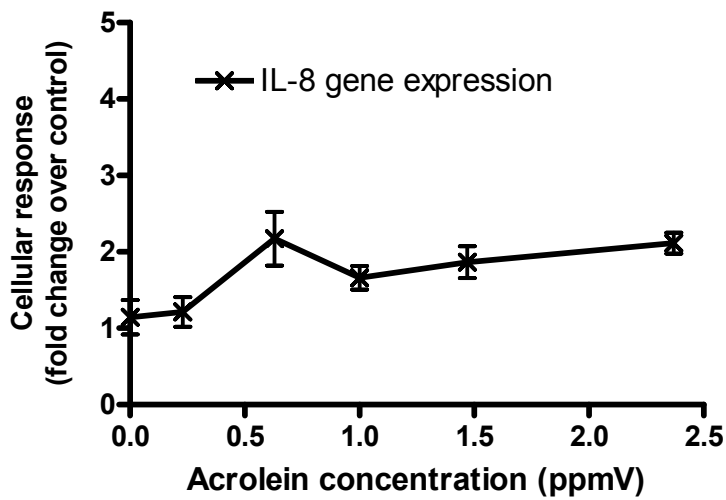

| Parameter                        | Value      | Data Set-B | Data Set-C | Data Set-D         |
|----------------------------------|------------|------------|------------|--------------------|
| Tukey's Multiple Comparison Test | Mean Diff. | q          | P value    | 95% CI of diff     |
| 0 vs 0.23                        | -0.07084   | 0.3067     | P > 0.05   | -1.070 to 0.9282   |
| 0 vs 0.63                        | -1.029     | 4.675      | P < 0.05   | -1.982 to -0.07688 |
| 0 vs 1.00                        | -0.5171    | 2.348      | P > 0.05   | -1.470 to 0.4354   |
| 0 vs 1.47                        | -0.7198    | 3.116      | P > 0.05   | -1.719 to 0.2793   |
| 0 vs 2.37                        | -0.9712    | 4.410      | P < 0.05   | -1.924 to -0.01858 |
| 0.23 vs 0.63                     | -0.9586    | 4.150      | P > 0.05   | -1.958 to 0.04046  |
| 0.23 vs 1.00                     | -0.4463    | 1.932      | P > 0.05   | -1.445 to 0.5528   |
| 0.23 vs 1.47                     | -0.6489    | 2.690      | P > 0.05   | -1.692 to 0.3946   |
| 0.23 vs 2.37                     | -0.9003    | 3.898      | P > 0.05   | -1.899 to 0.09875  |
| 0.63 vs 1.00                     | 0.5123     | 2.327      | P > 0.05   | -0.4402 to 1.465   |
| 0.63 vs 1.47                     | 0.3097     | 1.341      | P > 0.05   | -0.6894 to 1.309   |
| 0.63 vs 2.37                     | 0.05830    | 0.2647     | P > 0.05   | -0.8943 to 1.011   |
| 1.00 vs 1.47                     | -0.2026    | 0.8774     | P > 0.05   | -1.202 to 0.7964   |
| 1.00 vs 2.37                     | -0.4540    | 2.062      | P > 0.05   | -1.407 to 0.4985   |
| 1.47 vs 2.37                     | -0.2514    | 1.088      | P > 0.05   | -1.250 to 0.7477   |

**Table S4. Statistical results for effects of methacrolein concentrations on IL-8 gene expression of A549 human alveolar epithelial lung cells**

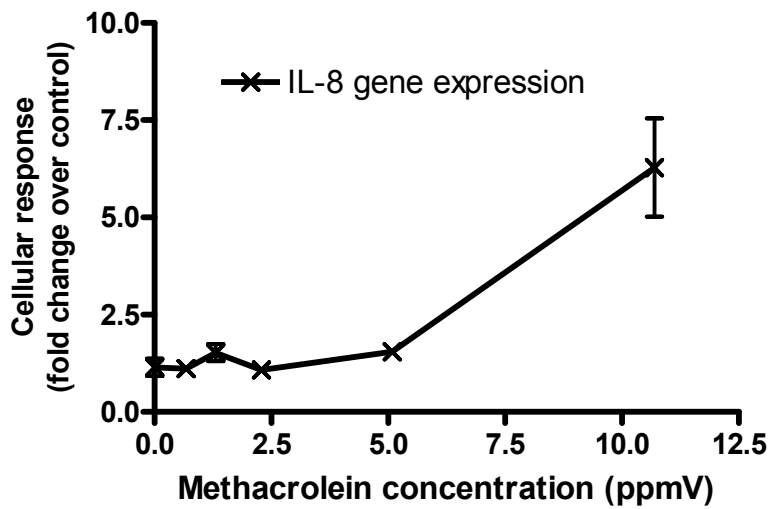

| Parameter                        | Value      | Data Set-B | Data Set-C | Data Set-D       |
|----------------------------------|------------|------------|------------|------------------|
| Tukey's Multiple Comparison Test | Mean Diff. | q          | P value    | 95% CI of diff   |
| 0 vs 0.68                        | -0.3673    | 0.5378     | P > 0.05   | -3.437 to 2.703  |
| 0 vs 1.31                        | -0.8467    | 1.240      | P > 0.05   | -3.917 to 2.223  |
| 0 vs 2.29                        | -0.2171    | 0.3178     | P > 0.05   | -3.287 to 2.853  |
| 0 vs 5.09                        | -0.7102    | 1.040      | P > 0.05   | -3.780 to 2.360  |
| 0 vs 10.7                        | -5.571     | 8.157      | P < 0.001  | -8.641 to -2.501 |
| 0.68 vs 1.31                     | -0.4794    | 0.7019     | P > 0.05   | -3.550 to 2.591  |
| 0.68 vs 2.29                     | 0.1502     | 0.2200     | P > 0.05   | -2.920 to 3.220  |
| 0.68 vs 5.09                     | -0.3429    | 0.5020     | P > 0.05   | -3.413 to 2.727  |
| 0.68 vs 10.7                     | -5.204     | 7.619      | P < 0.001  | -8.274 to -2.134 |
| 1.31 vs 2.29                     | 0.6296     | 0.9218     | P > 0.05   | -2.440 to 3.700  |
| 1.31 vs 5.09                     | 0.1365     | 0.1999     | P > 0.05   | -2.934 to 3.207  |
| 1.31 vs 10.7                     | -4.724     | 6.917      | P < 0.01   | -7.794 to -1.654 |
| 2.29 vs 5.09                     | -0.4931    | 0.7220     | P > 0.05   | -3.563 to 2.577  |
| 2.29 vs 10.7                     | -5.354     | 7.839      | P < 0.001  | -8.424 to -2.284 |
| 5.09 vs 10.7                     | -4.861     | 7.117      | P < 0.01   | -7.931 to -1.791 |
